# Supplementary material for: Outcomes in patients with heart failure treated in hospitals with varying admission rates: population-based cohort study
Source: PubMed Central journal article supplement — BMJ Qual Saf. 2014 Jul 31;23(12):981–8. doi: 10.1136/bmjqs-2014-002816 (PMC4255669; doi:10.1136/bmjqs-2014-002816), 2014-07-31
Supplement: bmjqs-2014-002816-s2.pdf [file bmjqs-2014-002816-s2.pdf]

**Appendix 1: Ontario Health Insurance Plan (OHIP) database and the Canadian Classification of Intervention (CCI) codes for cardiac procedures**

| <b>Procedure</b>                                                                                        | <b>CCI (ICD-10) codes</b>                                                       | <b>OHIP fee code</b>                                                                                       |
|---------------------------------------------------------------------------------------------------------|---------------------------------------------------------------------------------|------------------------------------------------------------------------------------------------------------|
| Left ventricular function testing by radionuclide angiography or echocardiography                       | 3IP30DA, 3IP30DB, 3IP30DC, 3IP30DD, 3IP30HA, 3IP30HB, 3IP30HC, 3IP30HD, 3IP70KP | G560, G561, G562, G566, G567, G568, G570, G571, G572, G574, G575, G577, G578, G581, Y813 without J808+J809 |
| Cardiac catheterization                                                                                 | 3IP10                                                                           | Z442, G297                                                                                                 |
| Coronary revascularization (percutaneous coronary intervention or coronary artery bypass graft surgery) | 1IJ26, 1IJ50, 1IJ55, 1IJ57, 1IJ76, 1IJ80                                        | Z434, R742, R743                                                                                           |

## **Appendix 2. Risk-adjustment model covariates for mortality<sup>14</sup>**

Age, sex, rural residence, neighborhood socioeconomic status, hospital type, myocardial infarction, prior heart failure (HF) hospitalization, coronary artery bypass graft surgery, percutaneous coronary intervention procedure, unstable angina, atherosclerotic disease, cardiopulmonary respiratory failure and shock, valvular heart disease, hypertension, cerebrovascular disease, renal disease, respiratory disease, pneumonia, diabetes mellitus, protein calorie malnutrition, dementia and senility, functional disability, peripheral vascular disease, cancer, trauma, major psychiatric disorders, chronic liver disease, Canadian Triage Acuity Score (CTAS), time of emergency department (ED) visit, ED length of stay, chief complaint, and number of HF ED visits in prior 3 years.

### **Appendix 3. Risk-adjustment model covariates for morbidity or death<sup>13,14</sup>**

Age, male sex, rural residence, neighborhood socioeconomic status, hospital type, prior coronary bypass surgery, prior heart failure (HF), prior acute coronary syndrome, arrhythmias, cardiopulmonary-respiratory failure and shock, valvular heart disease, peripheral vascular disease, chronic atherosclerosis, other heart disease, functional disability, stroke, renal failure, chronic obstructive pulmonary disease, diabetes and diabetes complications, fluid/electrolyte/acid-base disorders, urinary tract disorders, decubital ulcers or chronic skin ulcer, other gastrointestinal disorders, peptic ulcer disease, severe hematologic disorders, nephritis, dementia and senility, metastatic cancer and acute leukemia, cancer, chronic liver disease, end-stage renal disease or dialysis, asthma, iron deficiency and other/unspecified blood disorders, pneumonia, drug and alcohol dependence, depression, other psychiatric disorders, fibrosis of lung and other chronic lung disorders, protein-calorie malnutrition, Canadian Triage Acuity Score (CTAS), time of emergency department (ED) visit, ED length of stay, chief complaint, and number of HF ED visits in prior 3 years.

**Appendix 4. Sensitivity analysis: Effect of HF admission rate on 30-day outcomes including urgent care centres (UCCs)**

|                                                        | <b>Hospital Admission Rate Tertile</b> | <b>Adjusted Hazards Ratio (95%CI)</b> | <b>p-value</b> |
|--------------------------------------------------------|----------------------------------------|---------------------------------------|----------------|
| ED visit or hospitalization for HF (Primary outcome)   | High                                   | Referent                              | Referent       |
|                                                        | Medium                                 | 1.06 (0.96-1.17)                      | 0.230          |
|                                                        | Low                                    | 1.19 (1.08-1.31)                      | <.001          |
| ED visit for HF (Co-primary outcome)                   | High                                   | Referent                              | Referent       |
|                                                        | Medium                                 | 1.10 (0.98-1.23)                      | 0.111          |
|                                                        | Low                                    | 1.29 (1.15-1.45)                      | <.001          |
| ED visit or hospitalization for cardiovascular disease | High                                   | Referent                              | Referent       |
|                                                        | Medium                                 | 1.11 (1.02-1.20)                      | 0.013          |
|                                                        | Low                                    | 1.17 (1.08-1.27)                      | <.001          |
| ED visit or hospitalization for all-causes             | High                                   | Referent                              | Referent       |
|                                                        | Medium                                 | 1.07 (1.00-1.14)                      | 0.055          |
|                                                        | Low                                    | 1.16 (1.09-1.23)                      | <.001          |
| ED visit for cardiovascular disease                    | High                                   | Referent                              | Referent       |
|                                                        | Medium                                 | 1.12 (1.01-1.24)                      | 0.036          |
|                                                        | Low                                    | 1.24 (1.12-1.37)                      | <.001          |
| ED visit for all-causes                                | High                                   | Referent                              | Referent       |
|                                                        | Medium                                 | 1.07 (1.00-1.15)                      | 0.058          |
|                                                        | Low                                    | 1.16 (1.09-1.25)                      | <.001          |

ED = emergency department, HF = heart failure
