# Supplementary figures and images for: Outcomes in patients with heart failure treated in hospitals with varying admission rates: population-based cohort study
Source: PubMed Central journal article supplement — BMJ Qual Saf. 2014 Jul 31;23(12):981–8. doi: 10.1136/bmjqs-2014-002816 (PMC4255669; doi:10.1136/bmjqs-2014-002816), 2014-07-31

Appendix Figure A. 30-day outcomes including UCCs

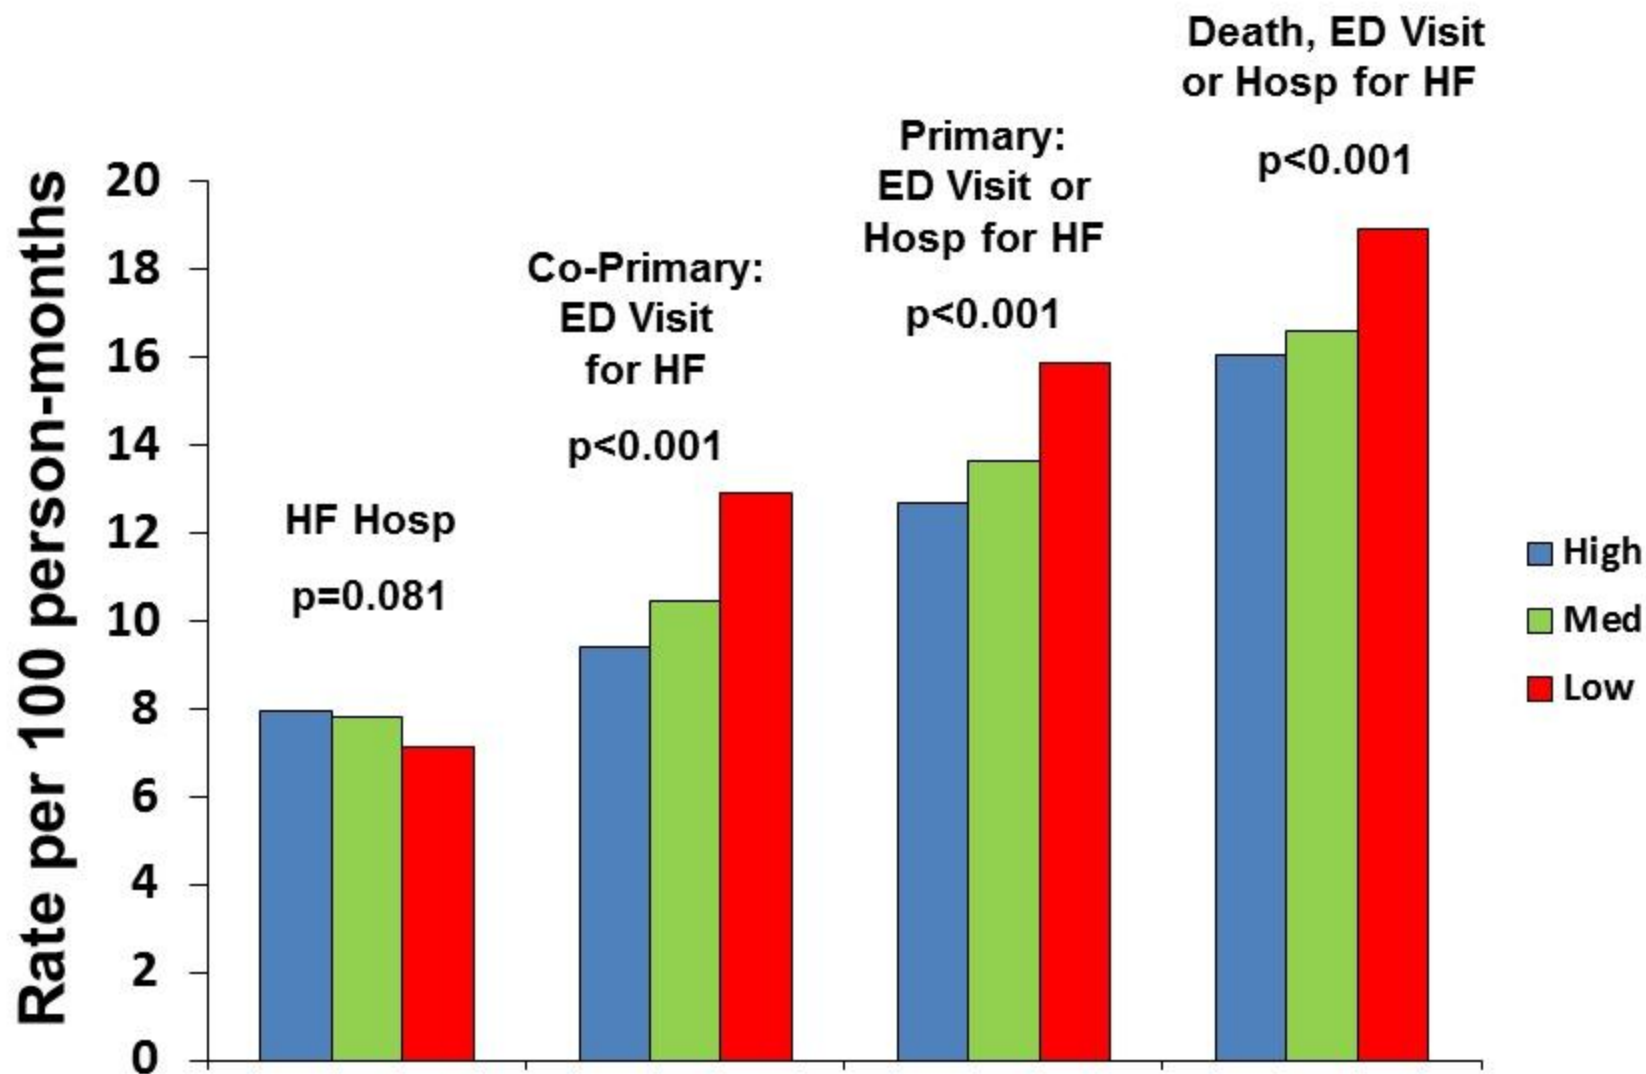

Supplement: bmjqs-2014-002816-s1.pdf [file bmjqs-2014-002816-s1.pdf]
